# Supplementary material for: Enhanced Anticancer Activity of Nedaplatin Loaded onto Copper Nanoparticles Synthesized Using Red Algae
Source: MDPI journal article supplement (doi:10.3390/pharmaceutics14020418), 2022-02-15
Supplement: s1 [file s1]

# Supplementary Materials: Enhanced Anticancer Activity of Nedaplatin Loaded Onto Copper Nanoparticles Synthesized Using Red Algae

Nada Mostafa Aboeita, Sherif Ashraf Fahmy, Mayyada M.H. El-Sayed, Hassan Mohamed El-Said Azzazy, Tamer Shoeib

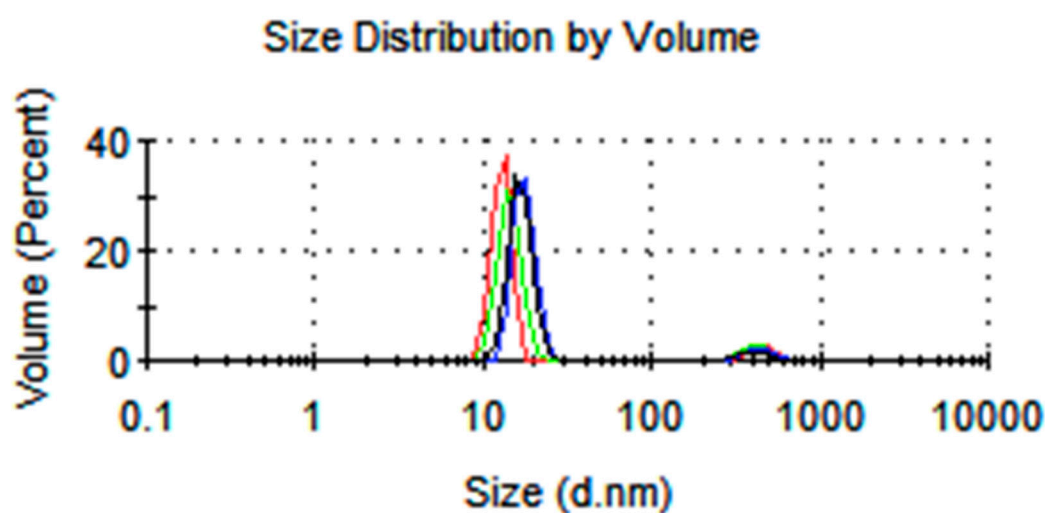

**Figure S1.** Size distribution curve for the biosynthesized copper nanoparticles at 25 oC and neutral pH.

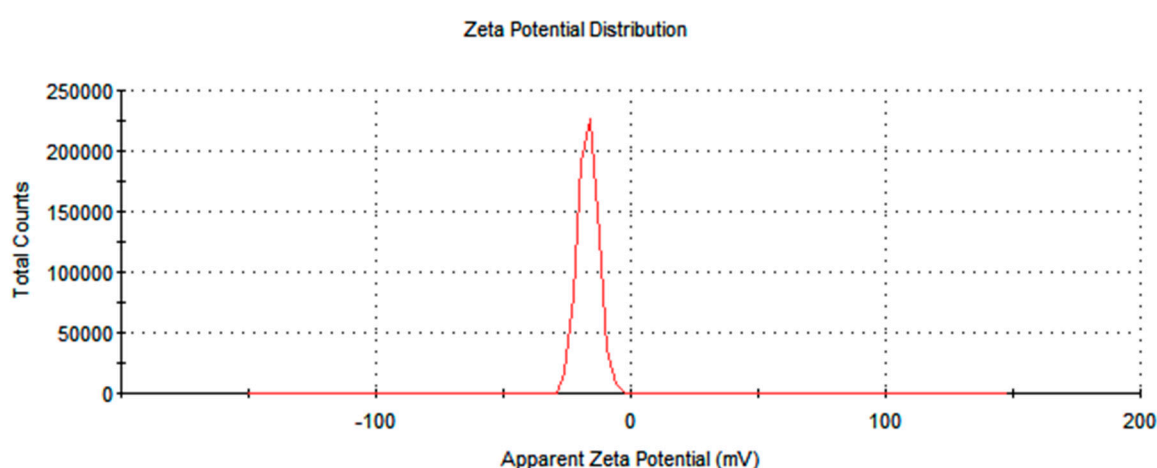

**Figure S2.** Zeta-potential for the biosynthesized copper nanoparticles at 25 oC and neutral pH.

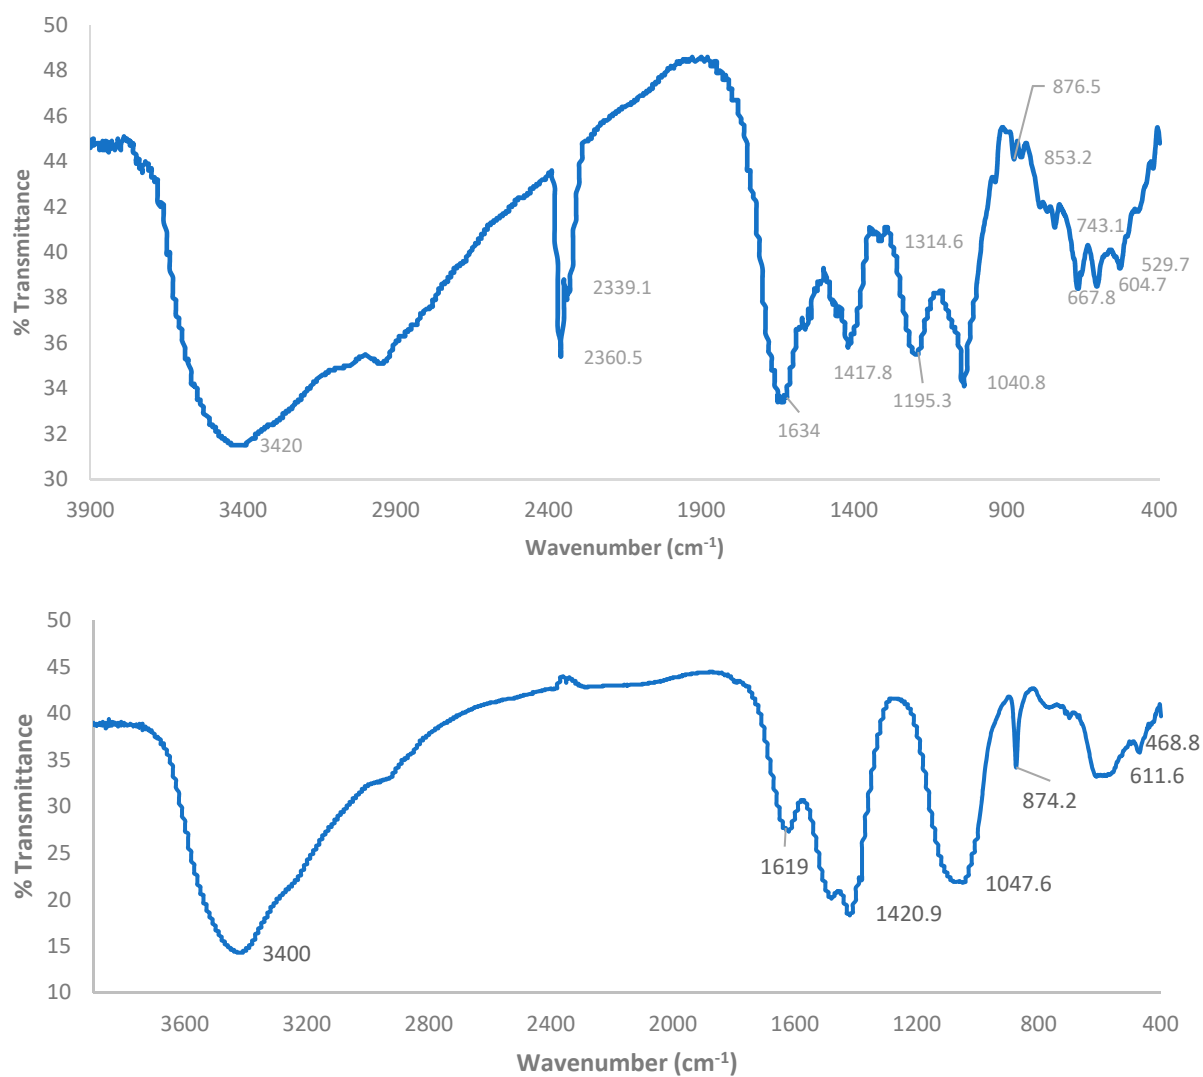

**Figure S3.** FTIR spectra of the algal extract (top panel) and Cu NPs (bottom panel).

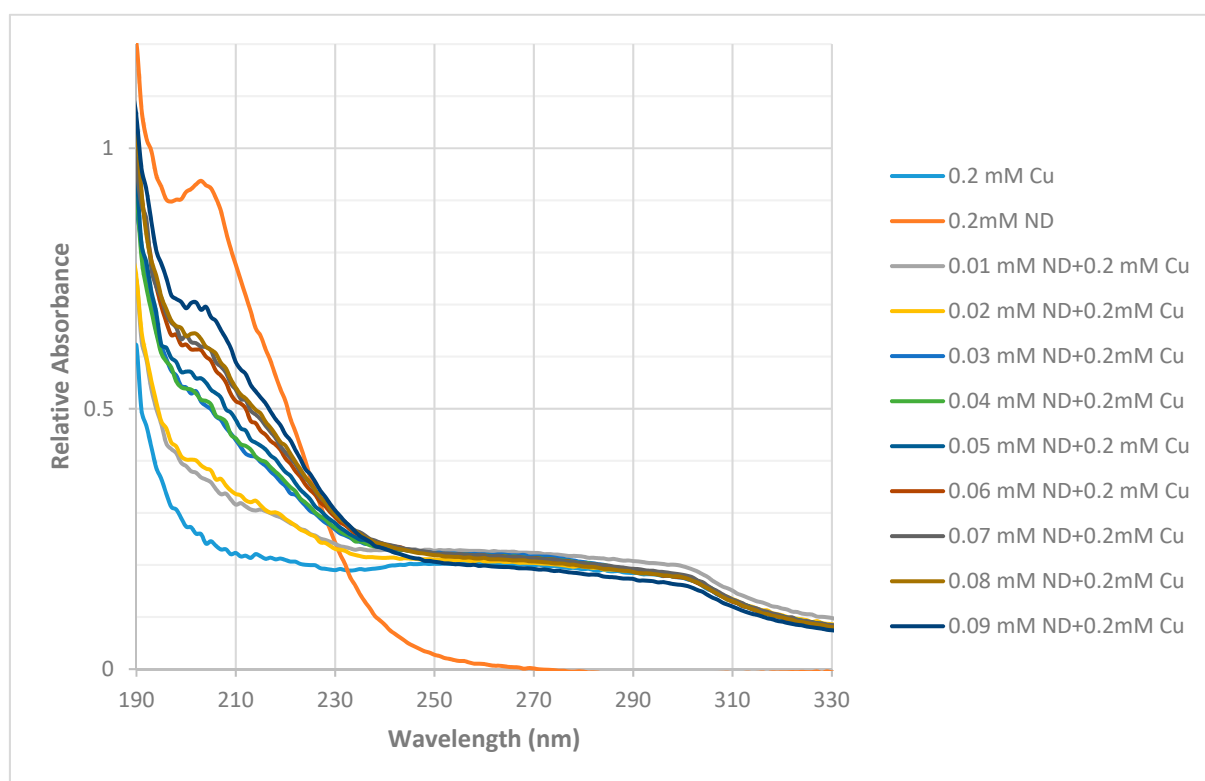

**Figure S4.** Absorbance spectra of 0.2 mM nedaplatin, 0.2 copper nanoparticles and several mixtures containing increasing concentration (ranging from 0.01-0.09 mM) of nedaplatin and a fixed concentration of 0.2 mM copper nanoparticles.

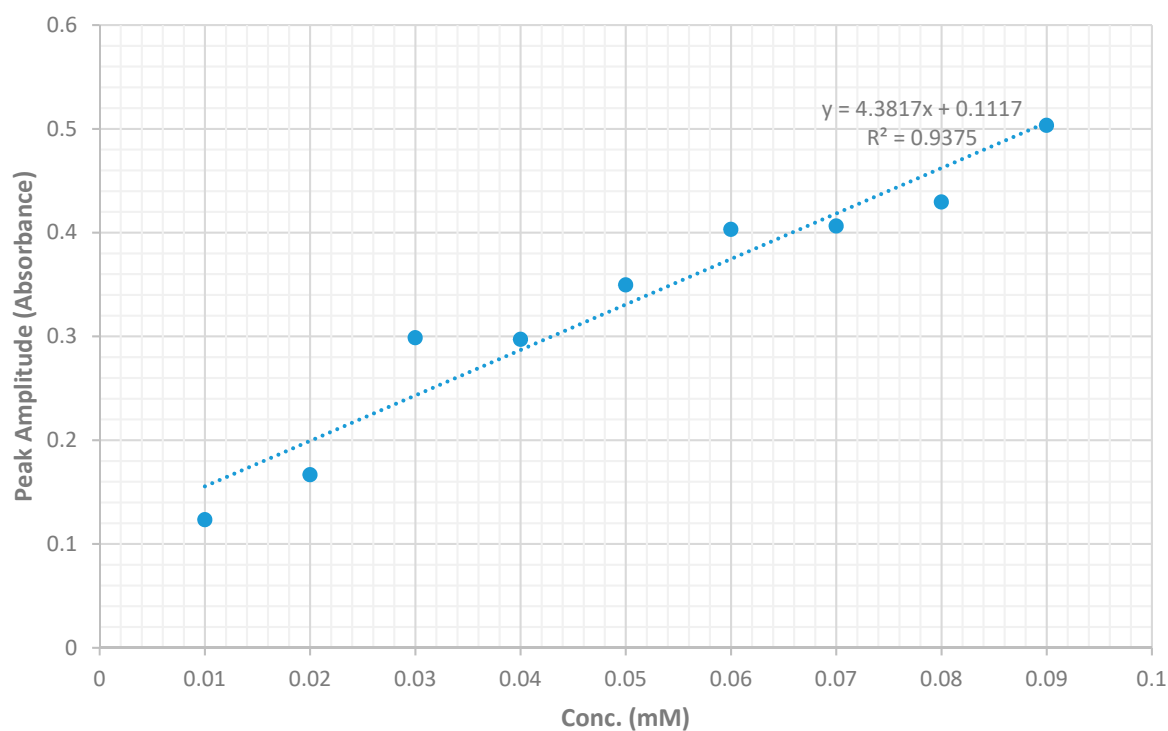

**Figure S5.** Peak amplitudes at 225 nm obtained from the mixture containing increasing concentration of nedaplatin from 0.01 mM to 0.09 mM and a 0.2 mM fixed concentration of copper nanoparticles.
